# Supplementary material for: A collection of sub-daily pressure and temperature observations for the early instrumental period with a focus on the "year without a summer" 1816
Source: Copernicus journal article supplement (doi:10.5194/cp-11-1027-2015), 2015-08-06
Supplement: Supplementary file [file cp-11-1027-2015-supplement.pdf]

Supplement of *Clim. Past*, 11, 1027–1047, 2015  
<http://www.clim-past.net/11/1027/2015/>  
doi:10.5194/cp-11-1027-2015-supplement  
© Author(s) 2015. CC Attribution 3.0 License.

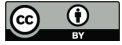

*Supplement of*

**A collection of sub-daily pressure and temperature observations for the early instrumental period with a focus on the “year without a summer” 1816**

**Y. Brugnara et al.**

*Correspondence to:* Y. Brugnara (yuri.brugnara@giub.unibe.ch)

The copyright of individual parts of the supplement might differ from the CC-BY 3.0 licence.

Table S1: Data sources and references for the land records. An asterisk marks the records that were digitised during the preparation of this paper. Most of this digitisation (with the only exception of Avignon) was carried out at the Institute of Geography of the University of Bern. Contemporary magazines and newspapers are written in italics. When original manuscripts were digitised, the archive, library or institution which provided copies of the documents is indicated.

| Station          | Source                                                     | References and Notes                                          |
|------------------|------------------------------------------------------------|---------------------------------------------------------------|
| Aarau*           | <i>Archiv der Medizin, Chirurgie und Pharmazie</i>         | Volumes 1–3                                                   |
| Albany*          | <i>The North American Review and Miscellaneous Journal</i> | Volume 1                                                      |
| Althorp*         | <i>The Quarterly Journal of Science and the Arts</i>       | Volumes 1–4                                                   |
| Armagh           | International Surface Pressure Databank                    | Yin et al. (2008)                                             |
| Avignon*         | Médiathèque d’Avignon                                      | Digitised by G. Pichard (Université Aix-Marseille)            |
| Barcelona        | University of Barcelona                                    | Rodríguez et al. (2001)                                       |
| Barnton*         | <i>The Edinburgh Magazine and Literary Miscellany</i>      | Volumes 77–80                                                 |
| Bologna*         | Library of the Astronomy Department, University of Bologna |                                                               |
| Boston*          | <i>Philosophical Magazine</i>                              | Volumes 47–51                                                 |
| Brunswick*       | National Climatic Data Center, Asheville, NC               |                                                               |
| Cadíz            | Project IMPROVE                                            | Barriendos et al. (2002)                                      |
| Calton Hill*     | <i>The Edinburgh Magazine and Literary Miscellany</i>      | Volumes 80–81                                                 |
| Cambridge*       | <i>The North American Review and Miscellaneous Journal</i> | Volumes 1–3                                                   |
| Coimbra*         | <i>Jornal de Coimbra</i>                                   | Volumes 7–10                                                  |
| Cracow*          | Jagiellonian University                                    | Hess (1982)                                                   |
| Derby*           | <i>The Annals of Philosophy</i>                            | Volume 11                                                     |
| Düsseldorf*      | <i>Amtsblatt für den Regierungsbezirk Düsseldorf</i>       | Years 1816–1817                                               |
| Exeter           | Project ACRE                                               | <a href="http://www.met-acre.org">http://www.met-acre.org</a> |
| Gdansk           | University of Gdańsk                                       | Filipiak and Miętus (2010)                                    |
| Geneva           | University of Bern                                         | Auchmann et al. (2012)                                        |
| Göteborg*        | National Archives, Stockholm                               |                                                               |
| Haarlem          | KNMI-Royal Netherlands Meteorological Institute            | Available on KNMI’s website                                   |
| Härnösand*       | National Archives, Stockholm                               |                                                               |
| Hohenpeissenberg | DWD-Deutscher Wetterdienst                                 | Winkler (2006)                                                |
| Karlsruhe        | Karlsruhe Institute of Technology                          |                                                               |
| London           | CRU, University of East Anglia                             | Cornes et al. (2012a)                                         |
| Lviv*            | <i>Lemberger Zeitung</i>                                   | Years 1815–1817                                               |
| Madrid           | Universidad de Extremadura                                 | Domínguez-Castro et al. (2014)                                |
| Milan            | Università degli Studi di Milano                           | Maugeri et al. (2002a,b, 2004)                                |
| Natchez*         | National Climatic Data Center, Asheville, NC               |                                                               |
| New Bedford*     | National Climatic Data Center, Asheville, NC               |                                                               |

Table S1: (continued)

| Station     | Source                                                         | References and Notes                                          |
|-------------|----------------------------------------------------------------|---------------------------------------------------------------|
| New Haven*  | National Climatic Data Center, Asheville, NC                   |                                                               |
| Nuuk*       | National Archives, Copenhagen                                  |                                                               |
| Padua*      | Library of the Astronomical Observatory, Padua                 | Camuffo et al. (2006)                                         |
| Paris (a)   | University of Barcelona                                        | Cornes et al. (2012b)                                         |
| Paris (b)*  | <i>Annales de Chimie et de Physique</i>                        | Volumes 1–6                                                   |
| Prague*     | Masaryk University                                             |                                                               |
| Quebec City | Project ACRE                                                   | <a href="http://www.met-acre.org">http://www.met-acre.org</a> |
| Rochefort   | Météo-France                                                   | Bleuse (2010)                                                 |
| Salem       | CRU, University of East Anglia                                 | van der Schrier and Jones (2008); avail. on CRU's website     |
| Stockholm   | Bolin Centre, Stockholm University                             | Moberg et al. (2002); available on Bolin Centre's website     |
| Turin       | SMI-Società Meteorologica Italiana, Turin                      | Di Napoli and Mercalli (2008)                                 |
| Umeå*       | National Archives, Stockholm                                   |                                                               |
| Uppsala     | Uppsala University                                             | Bergström and Moberg (2002)                                   |
| Valencia    | Justus Liebig University of Giessen                            | Domínguez-Castro et al. (2014)                                |
| Växjö*      | National Archives, Stockholm                                   |                                                               |
| Vienna      | ZAMG-Central Institute for Meteorology and Geodynamics, Vienna |                                                               |
| Ylitornio   | University of Helsinki                                         | Klingbjør and Moberg (2003); Holopainen (2006)                |
| Žitenice    | Masaryk University                                             | Brázdil et al. (2007)                                         |
| Zwanenburg  | KNMI-Royal Netherlands Meteorological Institute                | Available on KNMI's website                                   |

Table S2: List of sub-daily pressure land records for the period 1815-1817 that are not included in the described collection but are listed in catalogues of archives/libraries, mentioned in the literature or published by contemporary magazines.

| Station             | Country     | Period    | Location of the manuscripts (if known) / Name and volumes of the magazine      |
|---------------------|-------------|-----------|--------------------------------------------------------------------------------|
| Arnhem              | Netherlands | 1782–1819 | KNMI-Royal Netherlands Meteorological Institute, De Bilt, Netherlands (copies) |
| Baltimore, MD       | U.S.A.      | 1817–1824 | Observations made in 1817 published in Brantz (1818)                           |
| Benefield           | England     | 1815–1858 | National Meteorological Archive, Exeter, U.K.                                  |
| Berlin              | Germany     | 1774–1826 | Berlin-Brandenburg Academy of Sciences and Humanities, Berlin, Germany         |
| Birmingham          | England     | 1793–1830 | Birmingham Archives and Heritage, Birmingham, U.K.                             |
| Carlisle            | England     | 1801–1824 |                                                                                |
| Charlottesville, VA | U.S.A.      | 1802–1816 | Coolidge Collection, Massachusetts Historical Society, Boston, MA, U.S.A.      |
| Chennai (Madras)    | India       | 1796–1824 | The Royal Society’s Library, London, U.K.                                      |
| Cookstown           | Ireland     | 1817–1853 | National Meteorological Archive, Exeter, U.K.                                  |
| Copenhagen          | Denmark     | 1767–1845 |                                                                                |
| Cork                | Ireland     | 1799–1823 | National Meteorological Archive, Exeter, U.K.                                  |
| Delft               | Netherlands | 1777–1829 | KNMI-Royal Netherlands Meteorological Institute, De Bilt, Netherlands (copies) |
| Dresden             | Germany     | 1812–1829 |                                                                                |
| Dudson              | England     | 1813–1817 | Library of Birmingham, U.K.                                                    |
| Falun               | Sweden      | 1803–1828 | National Archives, Stockholm, Sweden                                           |
| Florence            | Italy       | from 1813 | Osservatorio Ximeniano, Florence, Italy                                        |
| Gävle               | Sweden      | 1817–1825 | National Archives, Stockholm, Sweden                                           |
| Gordon Castle       | Scotland    | 1781–1821 | National Meteorological Archive, Exeter, U.K.                                  |
| Guilsborough        | England     | 1815–1863 | National Meteorological Archive, Exeter, U.K.                                  |
| Hedvigsfors         | Sweden      | 1810–1819 | National Archives, Stockholm, Sweden                                           |
| Helsinki            | Finland     | 1780–1819 | National Archives, Stockholm, Sweden                                           |
| Holywell            | Wales       | 1793–1832 | National Meteorological Archive, Exeter, U.K.                                  |
| Hudiksvall          | Sweden      | 1813–1861 | National Archives, Stockholm, Sweden                                           |
| Kaliningrad         | Russia      | 1815–1817 | Published in Bessel (1816, 1817)                                               |
| Kangasniemi         | Finland     | 1810–1815 | National Archives, Helsinki, Finland                                           |
| Kinfauns Manse      | Scotland    | 1816–1820 | National Archives of Scotland, Edinburgh, U.K.                                 |
| Lancaster           | England     | 1817–1820 |                                                                                |
| London (Greenwich)  | England     | 1811–1851 | National Meteorological Archive, Exeter, U.K.                                  |
| London (Holborn)    | England     | 1815–1817 | Published in <i>The London Medical Repository</i> , volumes 3–9                |
| London (Kew)        | England     | 1773–1840 | National Meteorological Archive, Exeter, U.K.                                  |
| London (Stanmore)   | England     | 1817      | Published in <i>Annals of Philosophy</i> , volumes 10–11                       |
| London (Strand)     | England     | 1815–1817 | Published in <i>Philosophical Magazine</i> , volumes 45–51                     |

Table S2: (continued)

| Station              | Country     | Period    | Location of the manuscripts (if known) / Name and volumes of the magazine        |
|----------------------|-------------|-----------|----------------------------------------------------------------------------------|
| London (Syon House)  | England     | 1782–1822 | National Meteorological Archive, Exeter, U.K.                                    |
| London (Tottenham)   | England     | 1797–1841 | National Meteorological Archive, Exeter, U.K.                                    |
| London (Walthamstow) | England     | 1816–1817 | Published in <i>Philosophical Magazine</i> , volumes 48–51                       |
| Lund                 | Sweden      | from 1740 | Lund University Library, Lund, Sweden; described by Barring et al. (1999)        |
| Maastricht           | Netherlands | 1802–1833 |                                                                                  |
| Manchester           | England     | 1794–1818 |                                                                                  |
| Mikkeli              | Finland     | 1816–1821 | National Archives, Helsinki, Finland                                             |
| Modbury              | England     | 1788–1822 | National Meteorological Archive, Exeter, U.K.                                    |
| Mongewell            | England     | 1770–1823 | The Royal Society’s Library, London, U.K.                                        |
| Montdidier           | France      | 1783–1869 | Bibliothèque Nationale de France, Paris, France                                  |
| New Malton           | England     | 1816–1820 |                                                                                  |
| Newcastle-upon-Tyne  | England     | 1802–1833 | Newcastle Literary and Philosophical Institute, Newcastle-upon-Tyne, U.K.        |
| Pavia                | Italy       | 1808–1815 | Published in <i>Giornale di Fisica, Chimica e Scienze Naturali</i> , volumes 1–9 |
| Penzance             | England     | 1807–1827 |                                                                                  |
| Perth                | Scotland    | 1813–1816 | National Archives of Scotland, Edinburgh, U.K.                                   |
| Plymouth             | England     | 1814–1817 | Published in <i>Annals of Philosophy</i> , volumes 3–8                           |
| Poitiers             | France      | 1792–1819 | Médiathèque F. Mitterrand, Poitiers, France                                      |
| Regensburg           | Germany     | 1815–1816 | Published in <i>Journal für Chemie und Physik</i> , volumes 13–18                |
| Richmond             | England     | 1815–1817 | Published in <i>The London Medical Repository</i> , volumes 3–9                  |
| Schiedam             | Netherlands | 1806–1841 | KNMI-Royal Netherlands Meteorological Institute, De Bilt, Netherlands (copies)   |
| Strängnäs            | Sweden      | 1786–1843 | National Archives, Stockholm, Sweden                                             |
| Strömbacka           | Sweden      | 1816–1826 | National Archives, Stockholm, Sweden                                             |
| Sunbury-on-Thames    | England     | 1795–1839 | National Meteorological Archive, Exeter, U.K.                                    |
| Thetfort             | England     | 1817–1837 |                                                                                  |
| Toulouse             | France      | 1809–1899 | Archives du canal du midi, Voies navigables de France, Toulouse, France          |
| Udine                | Italy       | 1803–1842 |                                                                                  |

# Bibliography

- Auchmann, R., Brönnimann, S., Breda, L., Bühler, M., Spadin, R., and Stickler, A.: Extreme climate, not extreme weather: the summer of 1816 in Geneva, Switzerland, *Clim. Past*, 8, 325–335, 2012.
- Barriendos, M., Martín-Vide, J., Peña, J. C., and Rodríguez, R.: Daily meteorological observations in Cádiz—San Fernando. Analysis of the documentary sources and the instrumental data content (1786–1996), *Climatic Change*, 53, 151–170, 2002.
- Bärring, L., Joensson, P., Achberger, C., Ekström, M., and Alexandersson, H.: The Lund instrumental record of meteorological observations: reconstruction of monthly sea-level pressure 1780–1997, *Int. J. Climatol.*, 19, 1427–1443, 1999.
- Bergström, H. and Moberg, A.: Daily air temperature and pressure series for Uppsala (1722–1998), *Climatic Change*, 53, 213–252, 2002.
- Bessel, F. W.: *Astronomische Beobachtungen auf der Königlichen Universitäts-Sternwarte in Königsberg, Zweite Abt.*, Nicolovius, Königsberg, 1816.
- Bessel, F. W.: *Astronomische Beobachtungen auf der Königlichen Universitäts-Sternwarte in Königsberg, Zweite Abt.*, Nicolovius, Königsberg, 1817.
- Bleuse, P.: La série climatologique ancienne de Rochefort, *La Météorologie*, 68, 41–49, 2010.
- Brantz, L.: *Meteorological Observations; Made in the Vicinity of Baltimore, During the Year 1817*, W. Gwynn, Office of the Federal Gazette, Baltimore, MD, 1818.
- Brázdil, R., Řezníčková, L., Valášek, H., and Kotyza, O.: Early instrumental meteorological observations in the Czech lands III: František Jindřich Jakub Kreybich, Žitenice, 1787–1829, *Meteorologický Časopis*, 10, 63–74, 2007.
- Camuffo, D., Cocheo, C., and Sturaro, G.: Corrections of systematic errors, data homogenisation and climatic analysis of the Padova pressure series (1725–1999), *Climatic Change*, 78, 493–514, 2006.
- Cornes, R. C., Jones, P. D., Briffa, K. R., and Osborn, T. J.: A daily series of mean sea-level pressure for London, 1692–2007, *Int. J. Climatol.*, 32, 641–656, 2012a.

- Cornes, R. C., Jones, P. D., Briffa, K. R., and Osborn, T. J.: A daily series of mean sea-level pressure for Paris, 1670–2007, *Int. J. Climatol.*, **32**, 1135–1150, 2012b.
- Di Napoli, G. and Mercalli, L.: *Il clima di Torino: tre secoli di osservazioni meteorologiche*, SMS, Turin, 2008.
- Domínguez-Castro, F., Vaquero, J., Rodrigo, F., Farrona, A., Gallego, M., García-Herrera, R., Barriendos, M., and Sanchez-Lorenzo, A.: Early Spanish meteorological records (1780–1850), *Int. J. Climatol.*, **34**, 593–603, 2014.
- Filipiak, J. and Miętus, M.: History of the Gdańsk pre-instrumental and instrumental record of meteorological observations and analysis of selected air pressure observations, in: *The Polish Climate in the European Context: An Historical Overview*, edited by Przybylak, R., Majorowicz, J., Brázdil, R., and Kejna, M., pp. 267–293, Springer, Dordrecht, 2010.
- Hess, M., ed.: Results of studies of the climatological station of the Jagiellonian University in Cracow, vol. 77 of *Zeszyty Naukowe UJ Prace Geograficzne*, Państwowe Wydawnictwo Naukowe, Cracow, 1982.
- Holopainen, J.: Reconstructions of past climates from documentary and natural sources in Finland since the 18th century, Ph.D. thesis, Department of Geology D9, Yliopistopaino, Helsinki, 2006.
- Klingbjør, P. and Moberg, A.: A composite monthly temperature record from Tornedalen in northern Sweden, 1802–2002, *Int. J. Climatol.*, **23**, 1465–1494, 2003.
- Maugeri, M., Buffoni, L., and Chlistovsky, F.: Daily Milan temperature and pressure series (1763–1998): history of the observations and data and metadata recovery, *Climatic Change*, **53**, 101–117, 2002a.
- Maugeri, M., Buffoni, L., Delmonte, B., and Fassina, A.: Daily Milan temperature and pressure series (1763–1998): completing and homogenising the data, *Climatic Change*, **53**, 119–149, 2002b.
- Maugeri, M., Brunetti, M., Monti, F., and Nanni, T.: Sea-level pressure variability in the Po Plain (1765–2000) from homogenized daily secular records, *Int. J. Climatol.*, **24**, 437–455, 2004.
- Moberg, A., Bergström, H., Krigsman, J. R., and Svanered, O.: Daily air temperature and pressure series for Stockholm (1756–1998), *Climatic Change*, **53**, 171–212, 2002.
- Rodríguez, R., Barriendos, M., Jones, P., Martín-Vide, J., and Pena, J.: Long pressure series for Barcelona (Spain). Daily reconstruction and monthly homogenization, *Int. J. Climatol.*, **21**, 1693–1704, 2001.
- van der Schrier, G. and Jones, P.: Daily temperature and pressure series for Salem, Massachusetts (1786–1829), *Climatic Change*, **87**, 499–515, 2008.
- Winkler, P.: *Hohenpeißenberg 1781-2006 - das älteste Bergobservatorium der Welt*, Deutscher Wetterdienst, Offenbach am Main, 2006.
- Yin, X., Gleason, B., Compo, G., Matsui, N., and Vose, R.: The International Surface Pressure Databank (ISPD) land component version 2.2, Tech. rep., National Climatic Data Center, Asheville, NC, available from <ftp://ftp.ncdc.noaa.gov/pub/data/ispd/doc/ISPD2>, 2008.
